# Supplementary material for: Heterogeneous degradation of carbamazepine by Prussian blue analogues in the interlayers of layered double hydroxides: performance, mechanism and toxicity evaluation
Source: Royal Society of Chemistry journal article supplement (doi:10.1039/c8ta08801b), 2018-11-26
Supplement: c8ta08801b1.pdf [file c8ta08801b1.pdf]

Supplementary information  
for  
**Heterogeneous degradation of carbamazepine by Prussian  
blue analogues in the interlayer of layered double  
hydroxides: performance, mechanism and toxicity  
evaluation**

Hanxuan Zeng,<sup>a</sup> Lin Deng,<sup>a,b,\*</sup> Zhou Shi,<sup>a</sup> Jinming Luo,<sup>b</sup> John Crittenden,<sup>b</sup>

<sup>a</sup> Key Laboratory of Building Safety and Energy Efficiency, Ministry of Education, Department of Water Engineering and Science, College of Civil Engineering, Hunan University, Changsha, Hunan 410082, PR China

<sup>b</sup> Brook Byers Institute for Sustainable Systems and School of Civil and Environmental Engineering, Georgia Institute of Technology, 828 West Peachtree Street, Atlanta, Georgia, 30332, United States

\*Corresponding authors

E-mail address: lindeng@hnu.edu.cn (L. Deng)

## Text S1. Materials and Reagents

Carbamazepine (CBZ,  $\geq 98.0\%$ ), Oxcarbazepine (OXC,  $\geq 98.0\%$ ), Atrazine (ATZ,  $\geq 99.0\%$ ), Bisphenol A (BPA,  $\geq 99.0\%$ ), and tetracycline (TC,  $\geq 98.0\%$ ), were supplied by Aladdin Industrial Co. (China). 5,5-dimethyl-1-pyrroline-N-oxide (DMPO), methanol (MeOH, HPLC grade,  $\geq 99.9\%$ ) and acetonitrile (HPLC grade,  $\geq 99.9\%$ ) were purchased from Sigma–Aldrich Chemical Co. Ltd. (USA). Aluminum nitrate nonahydrate ( $\text{Al}(\text{NO}_3)_3 \cdot 9\text{H}_2\text{O}$ ), magnesium nitrate hexahydrate ( $\text{Mg}(\text{NO}_3)_2 \cdot 6\text{H}_2\text{O}$ ), cobalt chloride hexahydrate ( $\text{CoCl}_2 \cdot 6\text{H}_2\text{O}$ ), trisodium citrate dihydrate ( $\text{Na}_3\text{C}_6\text{H}_5\text{O}_7 \cdot 5\text{H}_2\text{O}$ ), potassium ferricyanide ( $\text{K}_3[\text{Fe}(\text{CN})_6]$ ), PMS ( $2\text{KHSO}_5 \cdot \text{KHSO}_4 \cdot \text{K}_2\text{SO}_4$ ), and tertiary butanol (TBA,  $\geq 98.0\%$ ) were obtained from Sinopharm Chemical Reagent Co. (China). All the chemicals and reagents were of at least analytical grade and used as received.

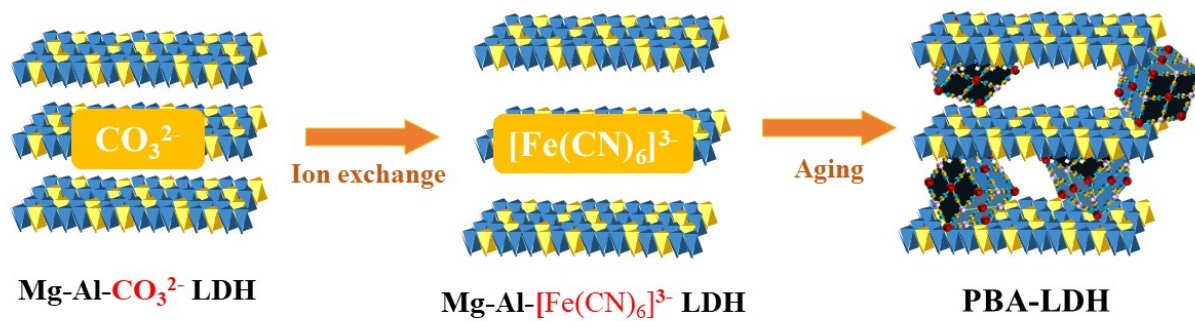

**Fig. S1.** Schematic Illustration for synthesis of PBA-LDH.

**Text S2. The detailed test conditions.****1. High performance liquid chromatography-electrospray ionization-tandem mass spectrometry (HPLC-ESI-MS/MS)**

The flow rate was set at 0.24 mL/min, being eluent A deionized water (containing 0.1% formic acid) and eluent B acetonitrile. The initial conditions of the elution gradient programmed were 90%A:10%B. From 5 to 30 min the eluent B was increased to 70%, held for 10 min and returned to initial conditions in 10 min. The injection volume of sample was set at 10  $\mu$ L.

**Table S1. Chemical Formula and Detailed Information for HPLC Analyses.**

| Compounds     | Formula                                                       | HPLC analytical condition |                                       |          |              |    | Wave-length (nm) |
|---------------|---------------------------------------------------------------|---------------------------|---------------------------------------|----------|--------------|----|------------------|
|               |                                                               | Mobile phase              |                                       |          |              |    |                  |
|               |                                                               | ultrapure water           | ultrapure water with 0.1% formic acid | Methanol | Acetonitrile |    |                  |
| Carbamazepine | C <sub>15</sub> H <sub>12</sub> N <sub>2</sub> O              | 40                        |                                       |          |              | 60 | 286              |
| Oxcarbazepine | C <sub>15</sub> H <sub>12</sub> N <sub>2</sub> O <sub>2</sub> | 45                        |                                       |          | 55           |    | 254              |
| Atrazine      | C <sub>8</sub> H <sub>14</sub> ClN <sub>5</sub>               | 30                        |                                       |          | 60           | 10 | 230              |
| Bisphenol A   | C <sub>15</sub> H <sub>16</sub> O <sub>2</sub>                | 60                        |                                       |          |              | 40 | 280              |
| Tetracycline  | C <sub>22</sub> H <sub>24</sub> N <sub>2</sub> O <sub>8</sub> |                           | 80                                    |          |              | 20 | 355              |

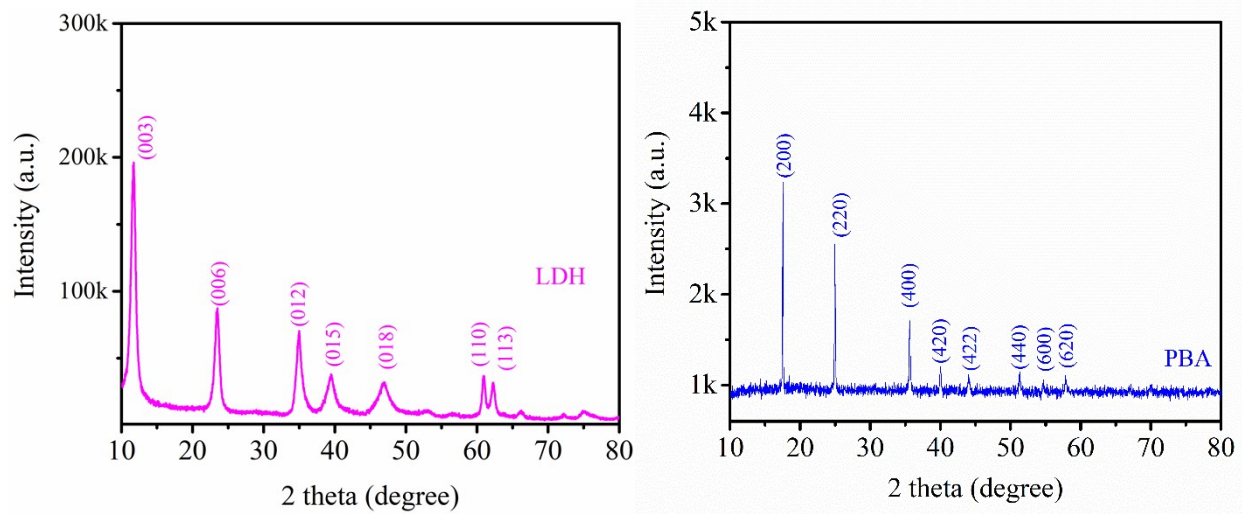

**Fig. S2.** XRD diffraction patterns of LDH and PBA.

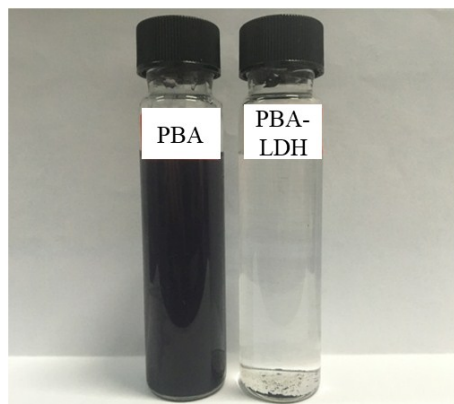

**Fig. S3.** Dispersion of PBA and PBA-LDH in CBZ solution.

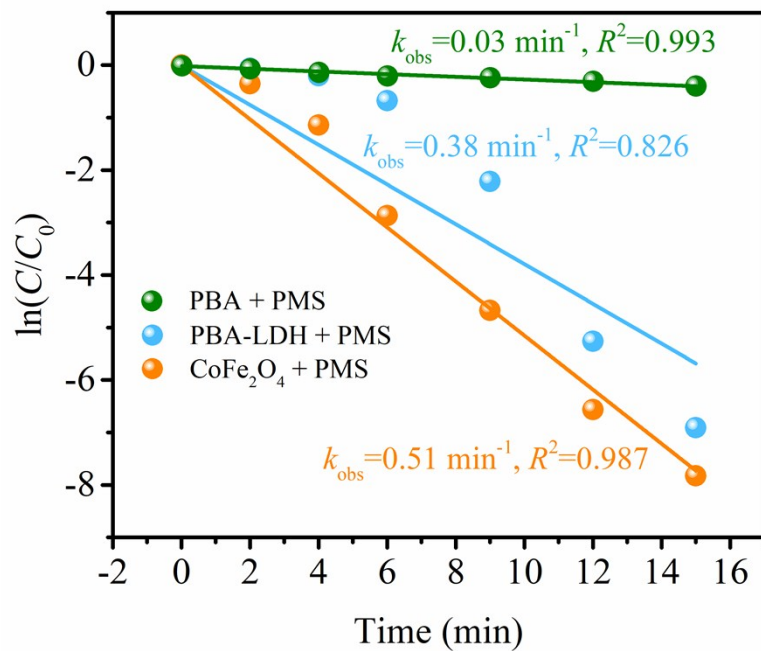

**Fig. S4.** Plots of  $\ln(C/C_0)$  *versus* reaction time.

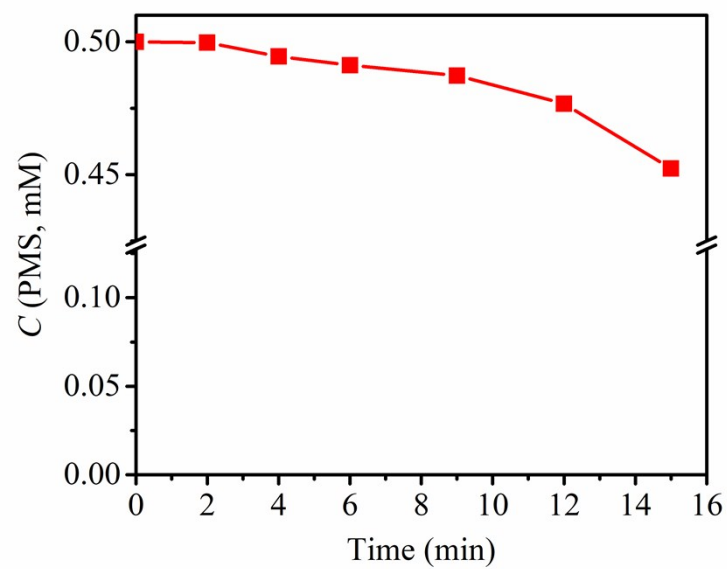

**Fig. S5.** PMS concentration variation in PBA-LDH activated PMS system.



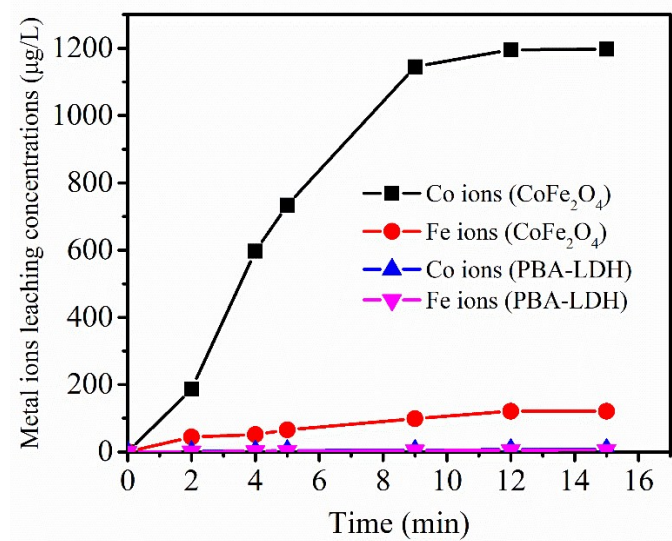

**Fig. S6.** Metal ions leaching concentrations in CoFe<sub>2</sub>O<sub>4</sub> and PBA-LDH activated PMS systems.

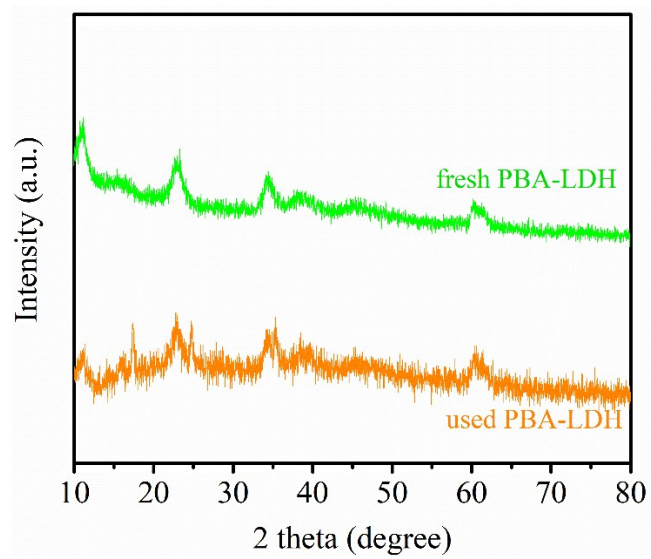

**Fig. S7.** XRD diffraction patterns of PBA-LDH before and after reaction.

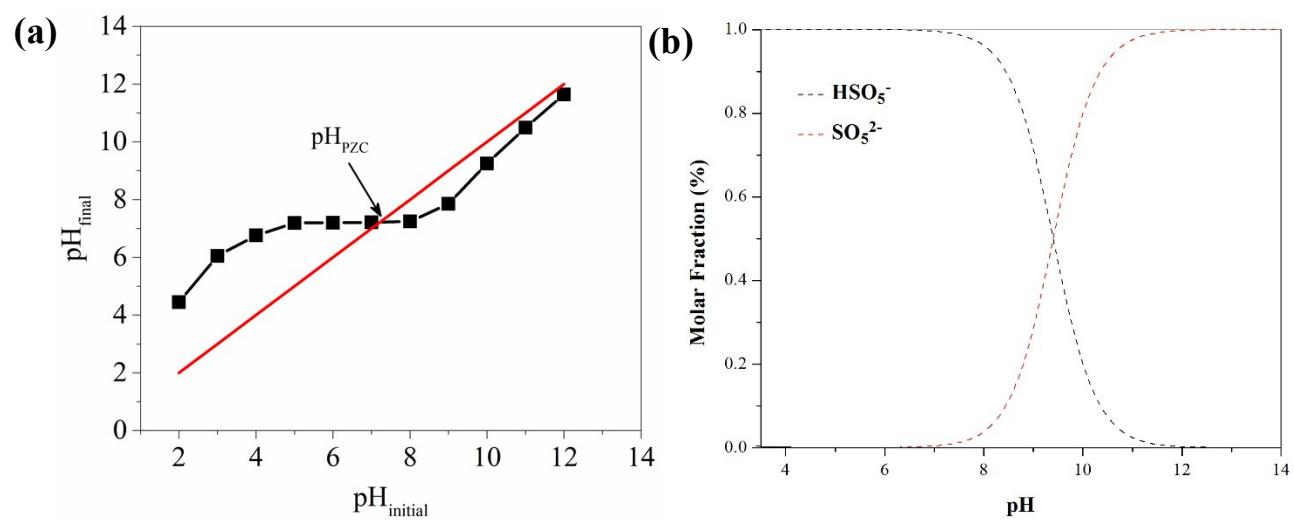

**Fig. S8.** (a) illustration of  $\text{pH}_{\text{PZC}}$  of PBA-LDH, (b) Species distribution of PMS at different pH values.

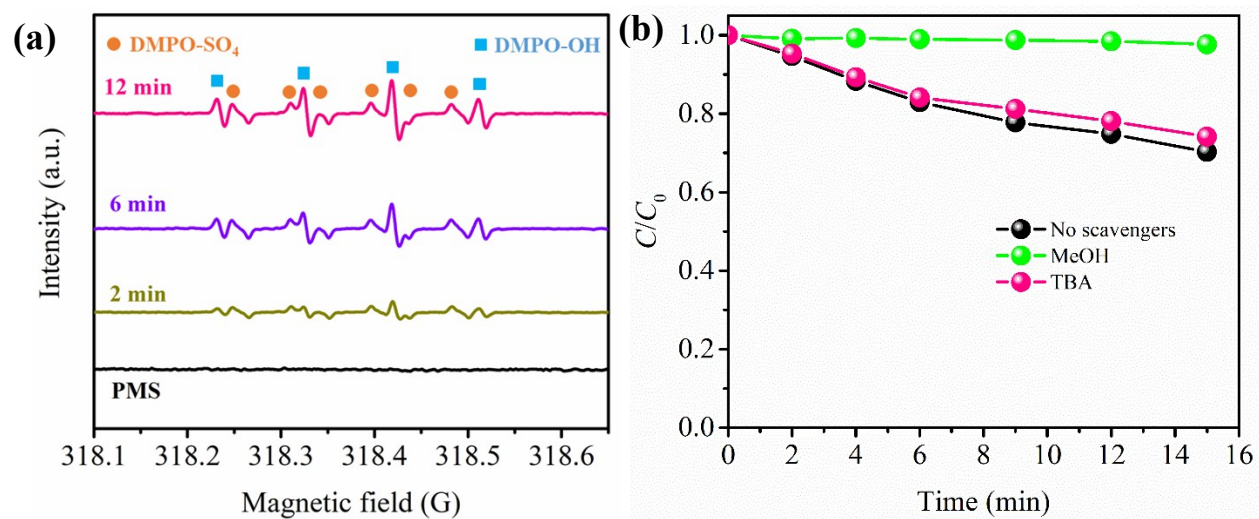

**Fig. S9.** (a) ESR spectra using DMPO as a spin-trapping agent at different time intervals; (b) Effect of MeOH and TBA on CBZ degradation (PBA dose 0.2 g/L, PMS dose 0.5 mM, CBZ concentration 20 mg/L, DMPO dose 100 mM, pH 7.0).

**Table S2.** The chemical composition of PBA-LDH before and after reaction (%).

|                    | Co   | Fe   | Mg    | Al   | C     | N    | O     |
|--------------------|------|------|-------|------|-------|------|-------|
| Before<br>reaction | 0.94 | 0.67 | 15.39 | 6.22 | 23.45 | 5.58 | 47.75 |
| After<br>reaction  | 0.95 | 0.68 | 14.82 | 7.35 | 22.06 | 5.52 | 48.62 |

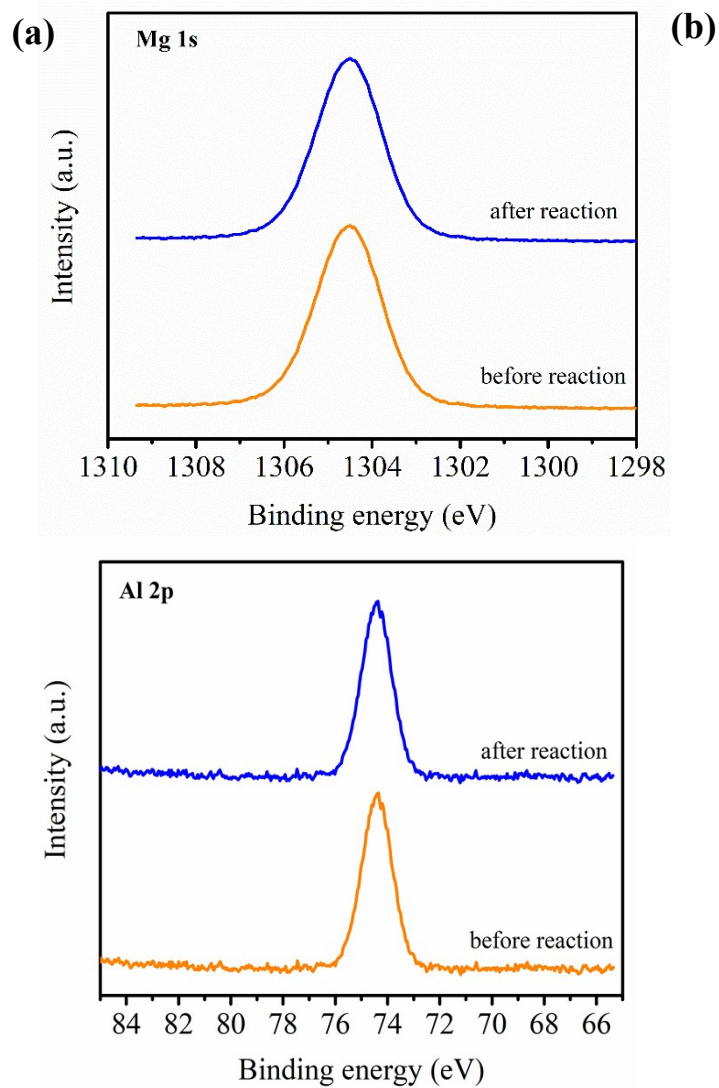

**Fig. S10.** High-resolution XPS spectra of (a) Mg 1s and (b) Al 2p before and after reaction.

**Table S3.** Peaks information of Co 2p<sub>3/2</sub>, Co 2p<sub>1/2</sub>, Fe 2p<sub>3/2</sub> and Fe 2p<sub>1/2</sub>.

| Co 2p                |                  | Binding<br>energy (eV) | Relative ratio (%) |                |
|----------------------|------------------|------------------------|--------------------|----------------|
|                      |                  |                        | Before reaction    | After reaction |
| Co 2p <sub>3/2</sub> | Co <sup>3+</sup> | 781.6                  | 58%                | 58%            |
|                      | Co <sup>2+</sup> | 783.5                  | 42%                | 42%            |
| Co 2p <sub>1/2</sub> | Co <sup>3+</sup> | 797.5                  | 57%                | 50%            |
|                      | Co <sup>2+</sup> | 798.5                  | 43%                | 50%            |
| Fe 2p <sub>3/2</sub> | Fe <sup>2+</sup> | 708.6                  | 89%                | 80%            |
|                      | Fe <sup>3+</sup> | 715.3                  | 11%                | 20%            |
| Fe 2p <sub>1/2</sub> | Fe <sup>2+</sup> | 721.5                  | 92%                | 79%            |
|                      | Fe <sup>3+</sup> | 723.9                  | 8%                 | 21%            |

**Table S4.** Oxidative intermediates of CBZ degradation by PBA-LDH activated PMS system.

| Product ID and structural formula | Retention time (min) | Proposed structure                                                                   | Measured accurate m/z |
|-----------------------------------|----------------------|--------------------------------------------------------------------------------------|-----------------------|
| A<br>$C_{15}H_{12}N_2O_2$         | 3.74                 | 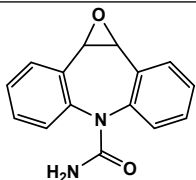   | 252.9000              |
| B<br>$C_{15}H_{12}N_2O_2$         | 3.74                 |    | 252.9000              |
| C<br>$C_{15}H_{10}N_2O_2$         | 7.54                 |    | 251.1000              |
| D<br>$C_{14}H_{11}NO$             | 7.54                 |   | 210.2000              |
| E<br>$C_{14}H_{11}N$              | 3.74                 |  | 193.1000              |
| F<br>$C_{14}H_{11}NO$             | 7.54                 |  | 210.2000              |
| G<br>$C_{13}H_9N$                 | 7.54                 |  | 180.1000              |
| H<br>$C_6H_{12}O$                 | 6.96                 |  | 99.0000               |
| I<br>$C_7H_6O_3$                  | 6.96                 |  | 137.0000              |



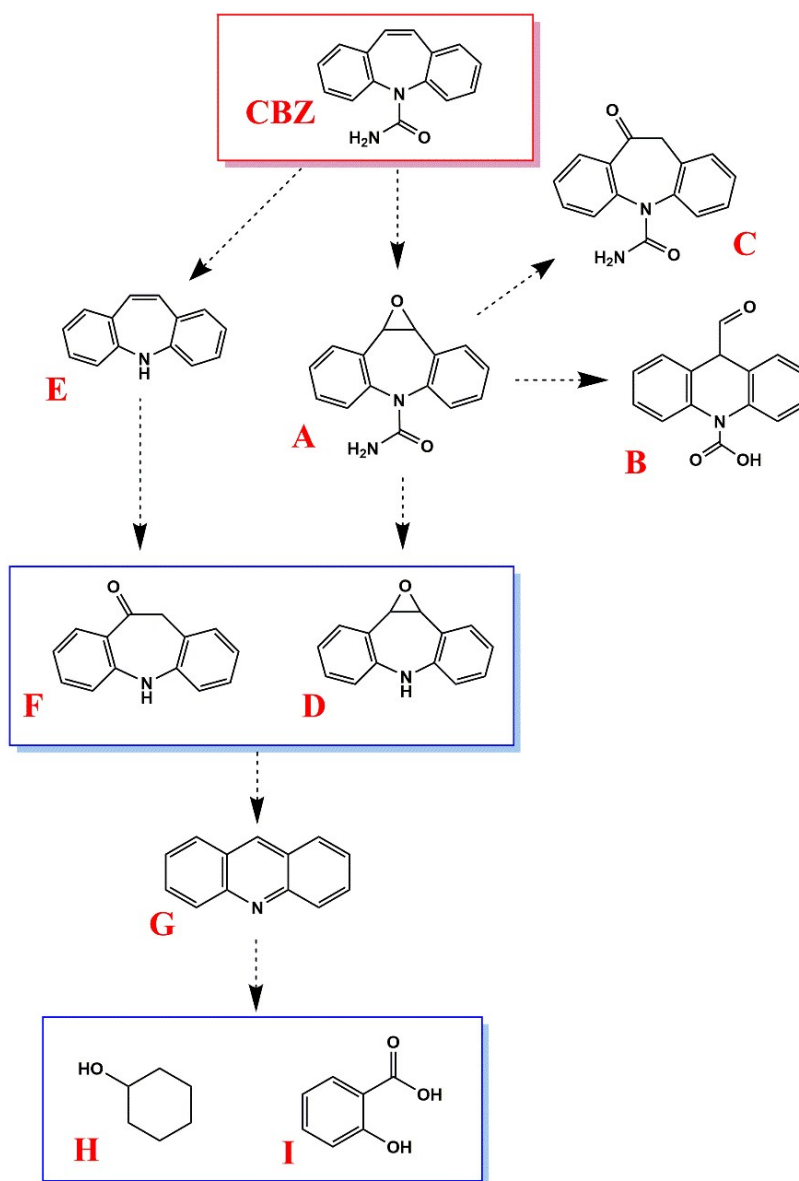

**Fig. S11.** Proposed pathways for CBZ degradation in PBA-LDH activated PMS system.

**Table S5.** Toxicity classification according to the Globally Harmonized System of Classification and Labelling of Chemicals (GHS) (**United Nations, 2011**)

| Toxicity range (mg/L)         | Class       |
|-------------------------------|-------------|
| $LC50/EC50/ChC \leq 1$        | Very toxic  |
| $1 < LC50/EC50/ChC \leq 10$   | Toxic       |
| $10 < LC50/EC50/ChC \leq 100$ | Harmful     |
| $LC50/EC50/ChC > 100$         | Not harmful |

**Table S6.** Basic characteristics of lake water, river water and well water.

| Sample      | pH   | TOC<br>(mg/L) | Ca<br>(mmol/L) | K<br>(mmol/L) | Mg<br>(mmol/L) | Na<br>(mmol/L) |
|-------------|------|---------------|----------------|---------------|----------------|----------------|
| Lake water  | 7.42 | 3.36          | 0.42           | 0.11          | 0.18           | 0.21           |
| River water | 7.83 | 4.27          | 0.91           | 0.07          | 0.34           | 0.35           |
| Well water  | 6.67 | 0.63          | 0.05           | 0.02          | 0.03           | 0.01           |

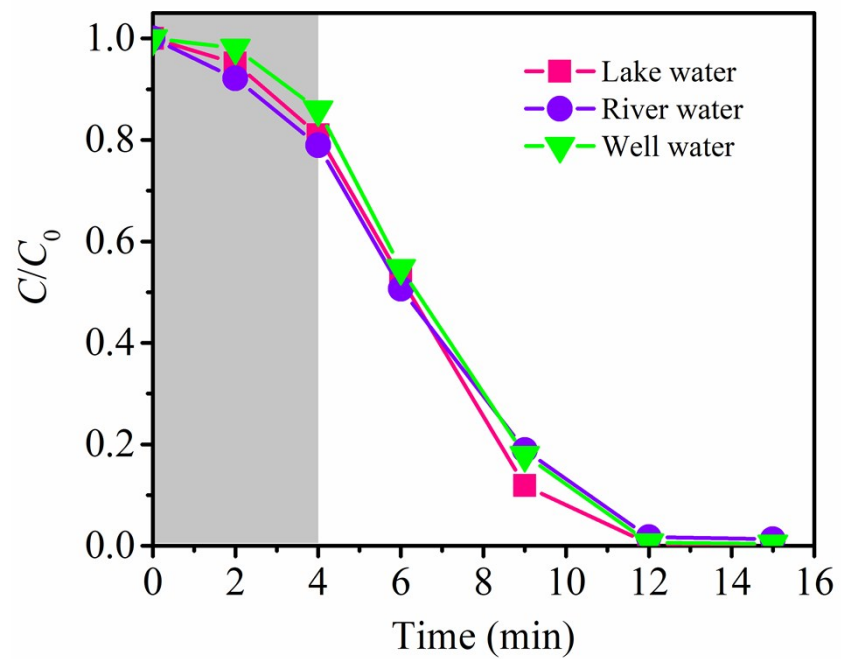

**Fig. S12.** PBA-LDH activated PMS system in treating lake water, river water and well water.
